# Supplementary material
Source: publisher figshare collection journal article supplement (https://acs.figshare.com/ndownloader/files/3771136)

***Supporting Information***

for

**Electronic Structure and Carrier Mobility of Two-dimensional  $\alpha$  Arsenic Phosphide**

**Fazel Shojaei**

Department of Chemistry and Bioactive Material Sciences and Research Institute of Physics and  
Chemistry, Jeonbuk National University, Jeonju, Chonbuk 561-756, Republic of Korea

*and*

**Hong Seok Kang<sup>\*</sup>**

Department of Nano and Advanced Materials, College of Engineering, Jeonju University, Hyoja-  
dong, Wansan-ku, Chonju, Chonbuk 560-759, Republic of Korea

\*Corresponding author: [hsk@jj.ac.kr](mailto:hsk@jj.ac.kr)

A full list of Ref. 15 is given below:

Liu, B.; Kopf, M.; Abbas, A. N.; Wang, X.; Guo, Q.; Jia, Y.; Xia, F.; Wehrich, R.; Bachhuber, F.; Pielhofer, F.; Wang, H.; Shall, R.; Cronin, S. B.; Ge, M.; Fang, X.; Nilges, T. Black Arsenic–Phosphorus: Layered Anisotropic Infrared Semiconductors with Highly Tunable Compositions and Properties. *Adv. Mater.* **2015**, DOI: 10.1002/adma.201501758.

## Methods for calculating of effective mass, elasticity modulus, and deformation potential:

### 1. Effective mass:

For example, we include 6~7  $k$ -points around the valence band maximum within 0.1 eV to perform a parabolic fit, which corresponds to  $R^2$  value of 0.99. Table 2 shows that the effective mass thus calculated is quite close to those presented in Ref. 2 for  $\alpha$  phosphorene.

### 2. Elastic modulus:

The elastic modulus  $C_{2D}$  of the longitudinal strain in the propagation directions (both x and y) of the longitudinal acoustic wave is derived from  $(E - E_0)/S_0 = C(\ell/\ell_0)^2/2$ , where  $E$  is the total energy and  $S_0$  is the lattice surface at equilibrium for a 2D system. In our calculation, five different strains, i.e., [-1%, -0.5%, 0, 0.5%, 1%] were taken into the fitting, along each of X and Y directions.

### 3. Deformation potential:

In a way similar to the case of fitting for the elastic modulus, we sample a series of five steps of dilation with 0.5% interval for the curve fitting of  $\Delta E_i$ . For more details, readers can refer to Figure 5 in Supplementary Information of Ref. 2. Also note that our calculated values for  $\alpha$  phosphorene are in reasonable agreements with those from Ref. 2. We recall that Ref. 2 uses optB88-mJB for structure optimization, not the PBE-D3 adopted in our work. That difference should be responsible for the small difference in the deformation energy obtained in our work from that shown in Ref. 2.

**Figure S1** Charge density distributions of the VB (a) and CB (b) at the  $\Gamma$ -point for the  $\alpha_1$  AsP.

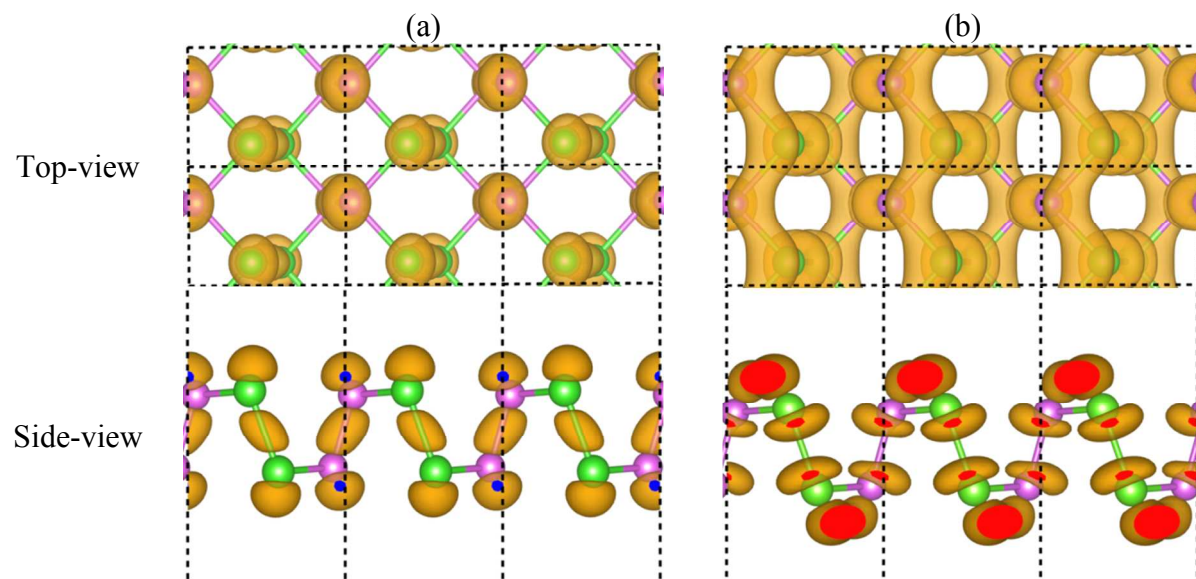

**Figure S2** Charge density distributions of the VB (a, c) and the CB (b, d) for the  $\alpha_1$  AsP at the  $X'$  and  $Y$  points, respectively. Noted that those for the  $\alpha_2$  AsP and the  $\alpha_3$  AsP at those points exhibit similar characteristics.

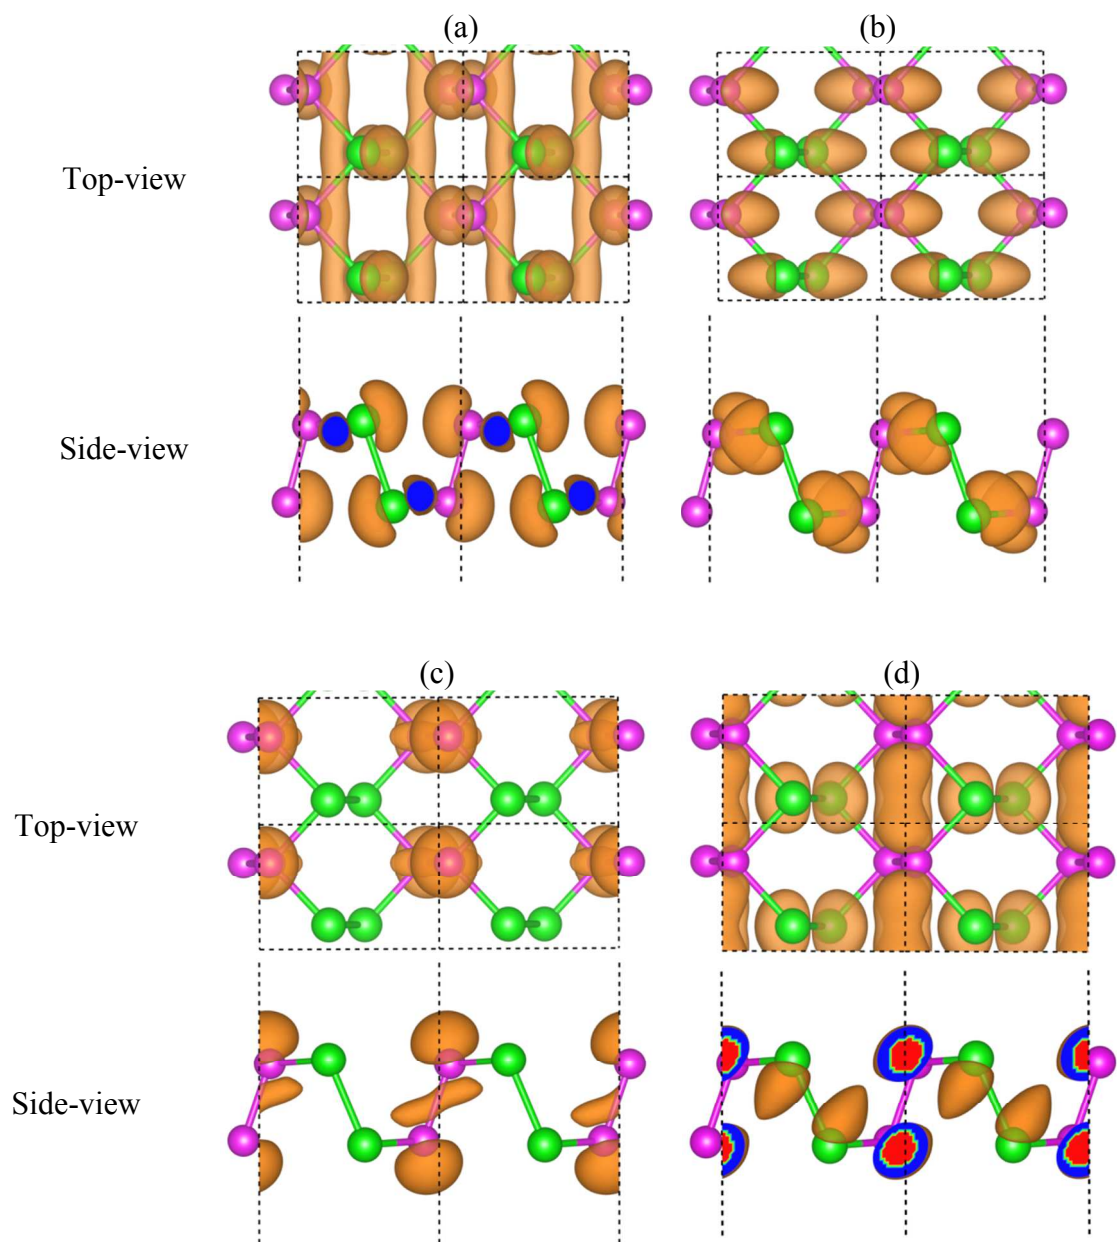

**Figure S3** Strain energy per atom in unit of eV versus isotropic biaxial ( $\sigma_{ac}:\sigma_{zz}=1:1$ ) or uniaxial strain ( $\sigma_{zz}$  or  $\sigma_{ac}$ ) along the armchair or zigzag direction, respectively, (a) and anisotropic biaxial strain ( $\sigma_{ac}:\sigma_{zz}=3:1$  or  $\sigma_{ac}:\sigma_{zz}=4:1$ ) (b) for the  $\alpha_1$  and the  $\alpha_3$  AsP in comparison with those for  $\alpha$  P.

(a)

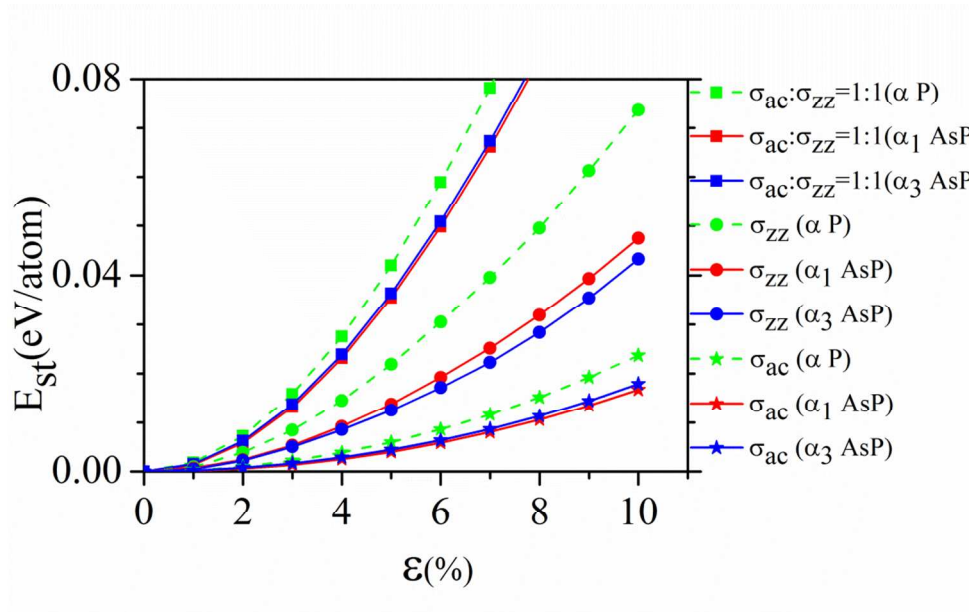

(b)

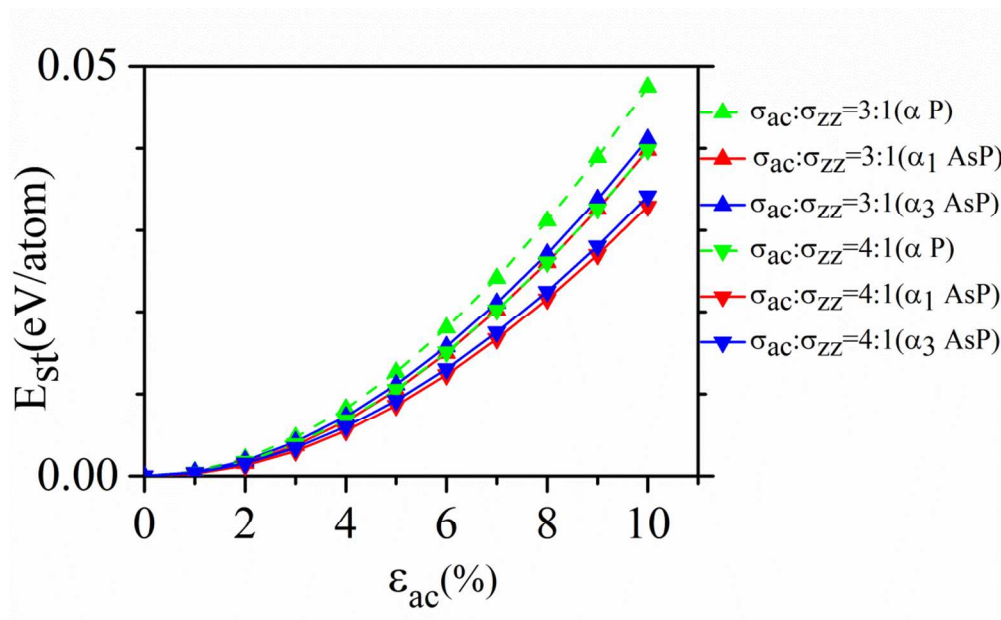

**Figure S4** Change of the lattice constant along the direction normal tot the applied uniaxial strain ( $\sigma_{zz}$  or  $\sigma_{ac}$ ) for the  $\alpha_1$  (a) and the  $\alpha_3$  (b) AsP.

(a)

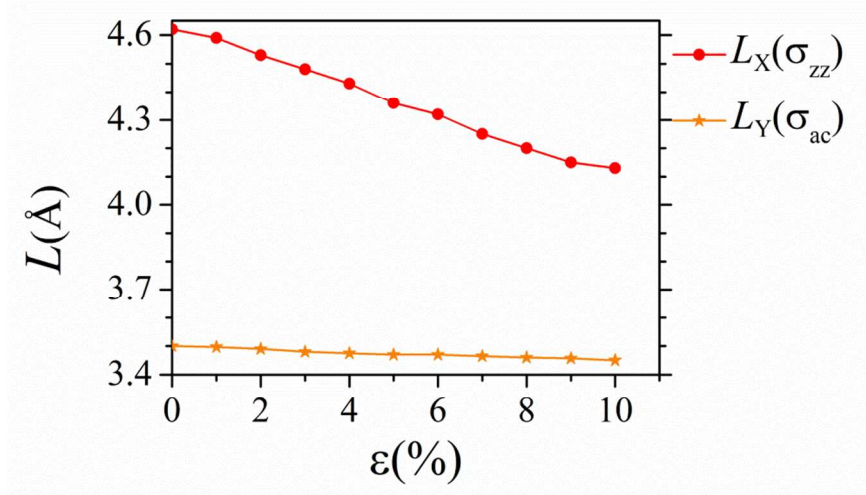

(b)

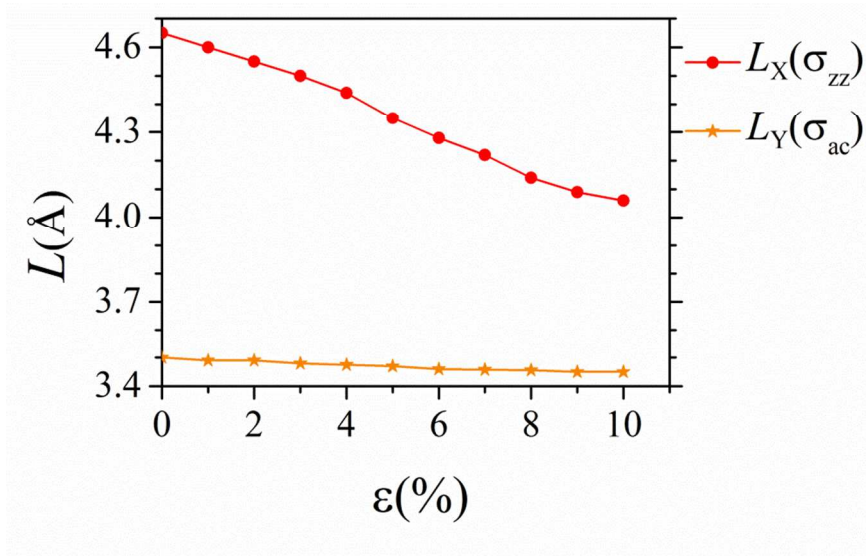



**Figure S5** HSE06 band structures at 7 (a) and 10% (b) uniaxial strain along the armchair direction for the  $\alpha_1$ AsP.

(a)

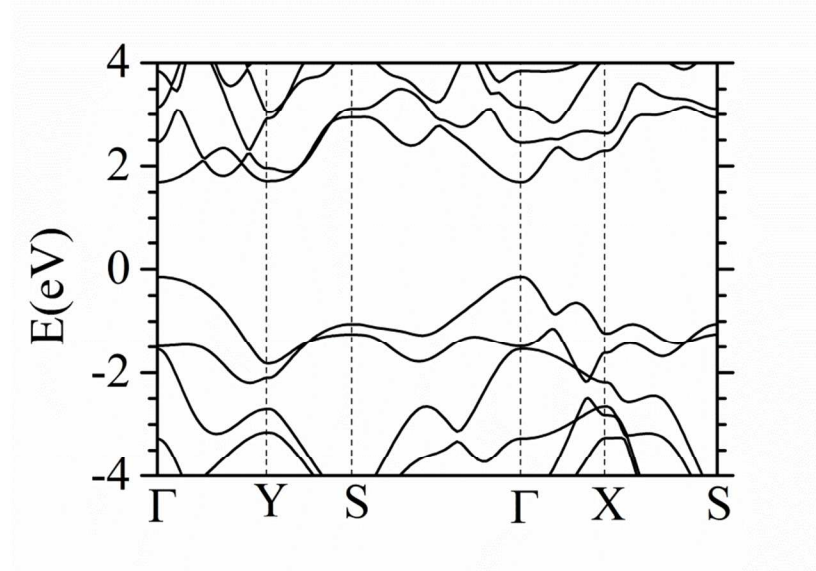

(b)

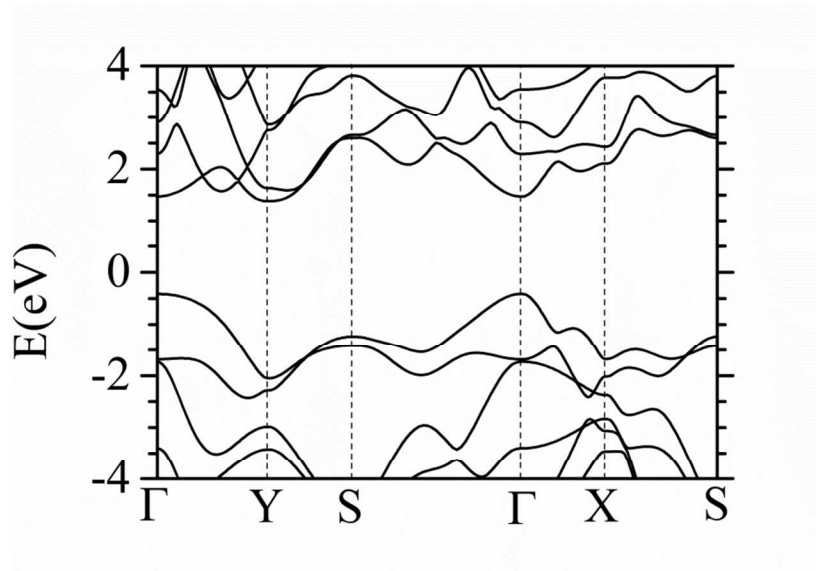

**Figure S6** HSE06 band structures at 2 (a) and 7% (b) uniaxial strain along the zigzag direction for the  $\alpha_1$  AsP.

(a)

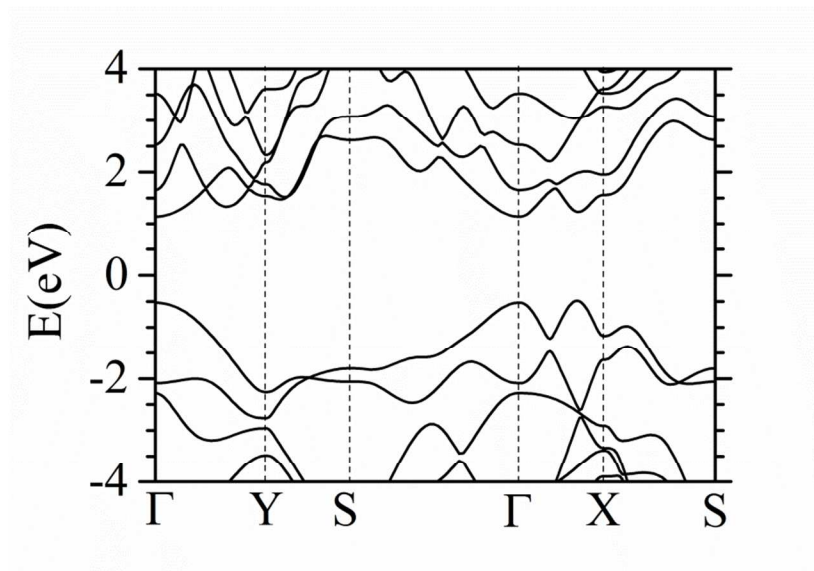

(b)

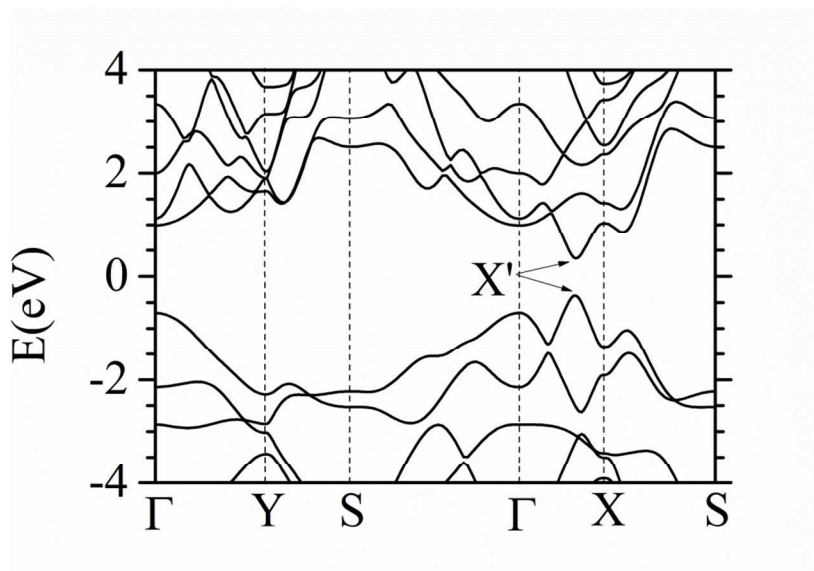

Supplement: Supplementary file 1 [file 3771136]
